# Supplementary material for: Supercritical N,N-dimethylformamide for the exfoliation and phase transition of layered manganese oxide materials to obtain trimanganese tetroxide nanosheets
Source: Royal Society of Chemistry journal article supplement (doi:10.1039/c3ra43000f), 2013-01-01
Supplement: c3ra43000f.pdf [file c3ra43000f.pdf]

# Supplementary Information for

## Supercritical N, N-Dimethylformamide for exfoliation and phase transition of layered manganese oxide materials to obtain trimanganese tetroxide nanosheets

Lixi Yi, Guoxin Hu\*

School of Mechanical and Power Engineering, Shanghai Jiaotong University, Shanghai 200240, China

### 1. Some relative characterizations

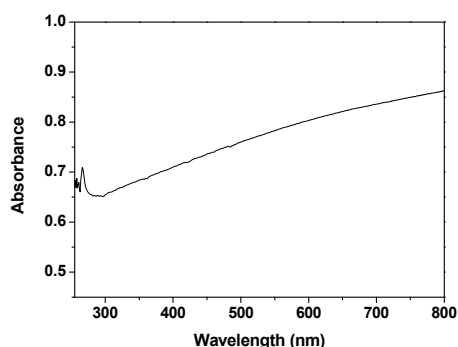

Fig. S1 UV-visible spectra of layered manganese oxides in the DMF solvent with a concentration of 0.25 mg mL<sup>-1</sup>.

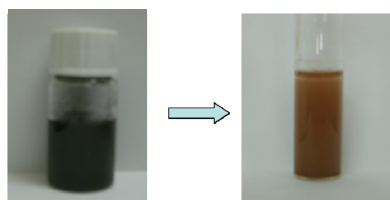

Fig. S2 Samples before (left) and after the SCF procedure (right).

### 2. Raman spectra

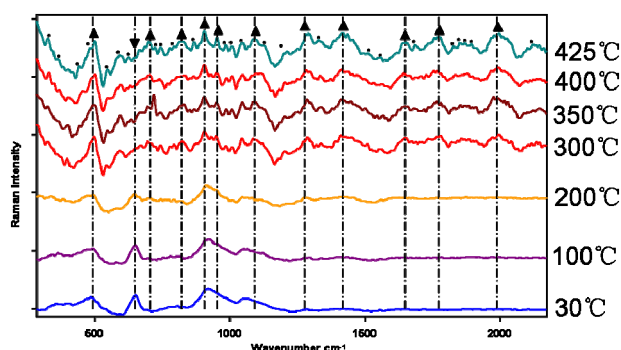

Fig. S3 *In situ* Raman spectra of the pre-intercalated bulk manganese oxides. The sample for *in situ* Raman was prepared with the mixture of layered manganese oxides and DMF in reactor increased to 200°C for a pre-intercalation for considering the effect of intercalation [Y. K. Hsu et al., Chemical Communications, 2011, 47, 1252-1254 & Z.-h. Liu et al., Langmuir 18, (2002) 4926-4932.] as much as possible, while the FTIR spectra of the samples with the temperature increased to 200°C, 300°C, and 400°C in the main text of paper indicate this treatment has little intercalation of molecules. Noises from the fluctuations in the spectra may be resulted from some thermal effects and the H<sub>2</sub>O produced in the transition or the combined H<sub>3</sub>O<sup>+</sup> [Chem. Mater. 16, (2004) 5581-5588 & J. Mater. Chem. 9, (1999) 319-333.]. (Ambient pressure, increasing velocity: 10 °C·min<sup>-1</sup>, keeping time: 10min)

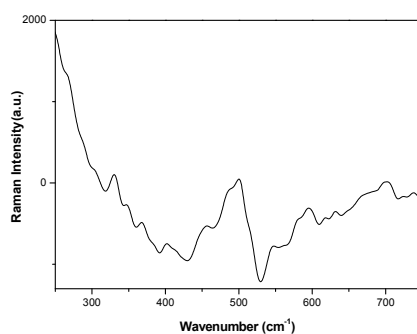

Fig. S4 Magnified *in situ* Raman spectra at 400°C of Fig. S4.

### 3. Assembly for long time

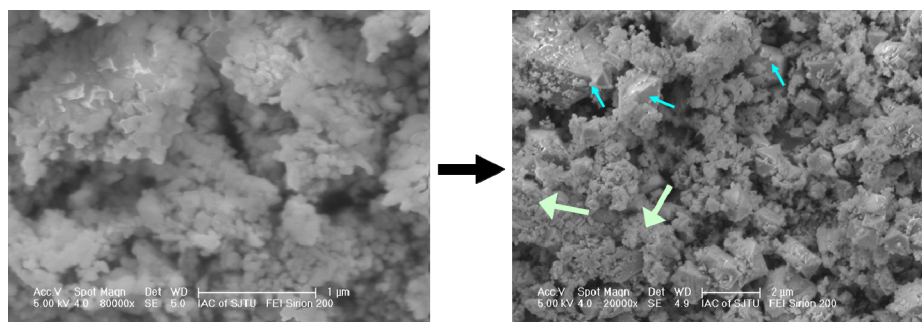

Fig. S5 Cracked nanosheet products in the exfoliating course (left) and the ones preserved in reactor for five more minutes (right).
